# Supplementary material
Source: PubMed Central journal article supplement (PMC2373803)

## Supplementary information

Table S1: the slopes and intercepts (with 95% confidence intervals) for the allometric relationship between distance from the tree top ( $H$ ) and conduit diameter ( $C$ ) and the relationship between the stem diameter ( $D$ ) and conduit diameter ( $C$ ). Data for *Nothofagus solandri* earlywood (E) and latewood (L) were sampled from low, mid and high altitudes, and data for *Pinus sylvestris*, and *Picea abies* were sampled from large and small islands. Each of the slope and intercept estimates are based on data pooled from 5 replicate trees, and  $p$  values state whether there were significant differences among those individual trees.

|                         | <b>Slope<br/>(95% C.I.)</b> | <b><math>p</math>-<br/>value</b> | <b>Intercept (95%<br/>C.I.)</b> | <b><math>p</math>-value</b> |
|-------------------------|-----------------------------|----------------------------------|---------------------------------|-----------------------------|
| <b>Log(C) vs Log(D)</b> |                             |                                  |                                 |                             |
| <i>N. solandri</i> (E)  |                             |                                  |                                 |                             |
| Low                     | 0.239 (0.211-0.270)         | 0.07                             | 1.117 (1.08-1.15)               | <0.0001                     |
| Mid                     | 0.219 (0.195-0.246)         | 0.87                             | 1.125 (1.09-1.16)               | 0.007                       |
| High                    | 0.238 (0.210-0.270)         | 0.54                             | 1.068 (1.02-1.11)               | 0.02                        |
| <i>N. solandri</i> (L)  |                             |                                  |                                 |                             |
| Low                     | 0.267 (0.224-0.317)         | 0.27                             | 0.910 (0.854-0.965)             | <0.0001                     |
| Mid                     | 0.258 (0.226-0.295)         | 0.47                             | 0.847 (0.790-0.904)             | 0.01                        |
| High                    | 0.255 (0.225-0.290)         | 0.51                             | 0.833 (0.785-0.881)             | 0.07                        |
| <i>P. sylvestris</i>    |                             |                                  |                                 |                             |
| Large                   | 0.218 (0.194-0.245)         | 0.08                             | 1.274 (1.257-1.291)             | 0.003                       |
| Small                   | 0.247 (0.213-0.285)         | 0.45                             | 1.234 (1.207-1.261)             | 0.96                        |
| <i>P. abies</i>         |                             |                                  |                                 |                             |
| Large                   | 0.254 (0.224-0.287)         | 0.31                             | 1.233 (1.212-1.255)             | 0.79                        |
| Small                   | 0.257 (0.227-0.292)         | 0.91                             | 1.241 (1.219-1.264)             | 0.25                        |
| <b>Log(C) vs Log(H)</b> |                             |                                  |                                 |                             |
| <i>N. solandri</i> (E)  |                             |                                  |                                 |                             |
| Low                     | 0.22 (0.197-0.245)          | 0.002                            | 1.443 (1.43-1.46)               | <0.0001                     |
| Mid                     | 0.229 (0.205-0.256)         | 0.62                             | 1.408 (1.39-1.42)               | 0.05                        |
| High                    | 0.268 (0.235-0.304)         | 0.50                             | 1.422 (1.41-1.44)               | 0.04                        |
| <i>N. solandri</i> (L)  |                             |                                  |                                 |                             |
| Low                     | 0.246 (0.211-0.286)         | 0.40                             | 1.216 (1.19-1.24)               | <0.0001                     |
| Mid                     | 0.269 (0.238-0.305)         | 0.24                             | 1.194 (1.17-1.22)               | 0.42                        |
| High                    | 0.286 (0.249-0.329)         | 0.21                             | 1.219 (1.20-1.24)               | 0.003                       |
| <i>P. sylvestris</i>    |                             |                                  |                                 |                             |
| Large                   | 0.150 (0.133-0.168)         | 0.71                             | 1.115 (1.084-1.146)             | 0.11                        |
| Small                   | 0.153 (0.133-0.176)         | 0.88                             | 1.071 (1.035-1.107)             | 0.33                        |
| <i>P. abies</i>         |                             |                                  |                                 |                             |
| Large                   | 0.147 (0.127-0.171)         | 0.48                             | 1.092 (1.051-1.133)             | 0.19                        |
| Small                   | 0.162 (0.144-0.183)         | 0.78                             | 1.066 (1.028-1.103)             | 0.27                        |

**Table S2:** Intercept and slope of allometric relationships between the conduit diameter (C) and stem diameter (D) for each tree sampled, estimated by SMA regression, with 95% confidence intervals in brackets.

| <b>Nothofagus earlywood</b> |           |        |          |       |                 |
|-----------------------------|-----------|--------|----------|-------|-----------------|
| Altitude                    | Intercept |        |          | Slope |                 |
| High                        | 1.03      | ( 0.89 | - 1.16 ) | 0.27  | ( 0.20 - 0.36 ) |
|                             | 1.12      | ( 0.92 | - 1.32 ) | 0.22  | ( 0.14 - 0.35 ) |
|                             | 1.09      | ( 0.98 | - 1.20 ) | 0.19  | ( 0.14 - 0.27 ) |
|                             | 1.03      | ( 0.92 | - 1.14 ) | 0.25  | ( 0.20 - 0.32 ) |
| Medium                      | 1.10      | ( 1.00 | - 1.19 ) | 0.23  | ( 0.19 - 0.29 ) |
|                             | 1.13      | ( 0.93 | - 1.33 ) | 0.22  | ( 0.14 - 0.33 ) |
|                             | 1.08      | ( 0.95 | - 1.21 ) | 0.22  | ( 0.17 - 0.28 ) |
|                             | 1.10      | ( 1.04 | - 1.17 ) | 0.23  | ( 0.19 - 0.26 ) |
| Low                         | 1.16      | ( 1.09 | - 1.22 ) | 0.20  | ( 0.17 - 0.24 ) |
|                             | 1.04      | ( 0.90 | - 1.19 ) | 0.23  | ( 0.17 - 0.32 ) |
|                             | 1.11      | ( 1.02 | - 1.19 ) | 0.19  | ( 0.16 - 0.23 ) |
|                             | 0.96      | ( 0.80 | - 1.13 ) | 0.26  | ( 0.20 - 0.34 ) |
|                             | 1.16      | ( 1.07 | - 1.24 ) | 0.20  | ( 0.16 - 0.24 ) |
|                             | 1.06      | ( 0.93 | - 1.18 ) | 0.26  | ( 0.21 - 0.32 ) |
|                             | 1.15      | ( 1.06 | - 1.23 ) | 0.23  | ( 0.20 - 0.27 ) |
| <b>Nothofagus latewood</b>  |           |        |          |       |                 |
| Altitude                    | Intercept |        |          | Slope |                 |
| High                        | 0.92      | ( 0.77 | - 1.06 ) | 0.22  | ( 0.15 - 0.32 ) |
|                             | 0.88      | ( 0.65 | - 1.10 ) | 0.26  | ( 0.16 - 0.40 ) |
|                             | 0.85      | ( 0.73 | - 0.97 ) | 0.22  | ( 0.17 - 0.30 ) |
|                             | 0.79      | ( 0.68 | - 0.89 ) | 0.28  | ( 0.24 - 0.34 ) |
| Medium                      | 0.84      | ( 0.73 | - 0.95 ) | 0.25  | ( 0.20 - 0.32 ) |
|                             | 0.76      | ( 0.54 | - 0.97 ) | 0.30  | ( 0.22 - 0.41 ) |
|                             | 0.91      | ( 0.73 | - 1.08 ) | 0.21  | ( 0.14 - 0.30 ) |
|                             | 0.86      | ( 0.74 | - 0.97 ) | 0.27  | ( 0.22 - 0.34 ) |
| Low                         | 0.81      | ( 0.67 | - 0.96 ) | 0.29  | ( 0.22 - 0.37 ) |
|                             | 0.85      | ( 0.66 | - 1.03 ) | 0.23  | ( 0.16 - 0.34 ) |
|                             | 0.90      | ( 0.76 | - 1.05 ) | 0.19  | ( 0.14 - 0.26 ) |
|                             | 0.82      | ( 0.68 | - 0.97 ) | 0.23  | ( 0.18 - 0.29 ) |
|                             | 0.87      | ( 0.69 | - 1.05 ) | 0.25  | ( 0.18 - 0.34 ) |
|                             | 0.90      | ( 0.79 | - 1.02 ) | 0.26  | ( 0.21 - 0.32 ) |
|                             | 0.88      | ( 0.69 | - 1.07 ) | 0.30  | ( 0.22 - 0.39 ) |
| <b>Picea</b>                |           |        |          |       |                 |
| Island size                 | Intercept |        |          | Slope |                 |
| Large                       | 1.30      | ( 1.26 | - 1.34 ) | 0.25  | ( 0.21 - 0.30 ) |
|                             | 1.25      | ( 1.21 | - 1.30 ) | 0.21  | ( 0.16 - 0.27 ) |
|                             | 1.23      | ( 1.14 | - 1.33 ) | 0.25  | ( 0.16 - 0.41 ) |
|                             | 1.28      | ( 1.24 | - 1.32 ) | 0.17  | ( 0.13 - 0.23 ) |
|                             | 1.27      | ( 1.25 | - 1.30 ) | 0.22  | ( 0.18 - 0.25 ) |
| Small                       | 1.20      | ( 1.14 | - 1.25 ) | 0.32  | ( 0.24 - 0.43 ) |
|                             | 1.25      | ( 1.13 | - 1.36 ) | 0.22  | ( 0.12 - 0.40 ) |
|                             | 1.25      | ( 1.18 | - 1.31 ) | 0.26  | ( 0.19 - 0.36 ) |
|                             | 1.26      | ( 1.17 | - 1.34 ) | 0.22  | ( 0.14 - 0.35 ) |
|                             | 1.25      | ( 1.19 | - 1.31 ) | 0.29  | ( 0.21 - 0.41 ) |
| <b>Pinus</b>                |           |        |          |       |                 |
| Island size                 | Intercept |        |          | Slope |                 |
| Large                       | 1.30      | ( 1.26 | - 1.34 ) | 0.25  | ( 0.21 - 0.30 ) |
|                             | 1.25      | ( 1.21 | - 1.30 ) | 0.21  | ( 0.16 - 0.27 ) |
|                             | 1.23      | ( 1.14 | - 1.33 ) | 0.25  | ( 0.16 - 0.41 ) |
|                             | 1.28      | ( 1.24 | - 1.32 ) | 0.17  | ( 0.13 - 0.23 ) |
|                             | 1.27      | ( 1.25 | - 1.30 ) | 0.22  | ( 0.18 - 0.25 ) |
| Small                       | 1.20      | ( 1.14 | - 1.25 ) | 0.32  | ( 0.24 - 0.43 ) |
|                             | 1.25      | ( 1.13 | - 1.36 ) | 0.22  | ( 0.12 - 0.40 ) |
|                             | 1.25      | ( 1.18 | - 1.31 ) | 0.26  | ( 0.19 - 0.36 ) |
|                             | 1.26      | ( 1.17 | - 1.34 ) | 0.22  | ( 0.14 - 0.35 ) |
|                             | 1.25      | ( 1.19 | - 1.31 ) | 0.29  | ( 0.21 - 0.41 ) |

**Figure S1:** Allometric relationships between the conduit diameter (C) and stem diameter (D), estimated each tree using SMA regression.

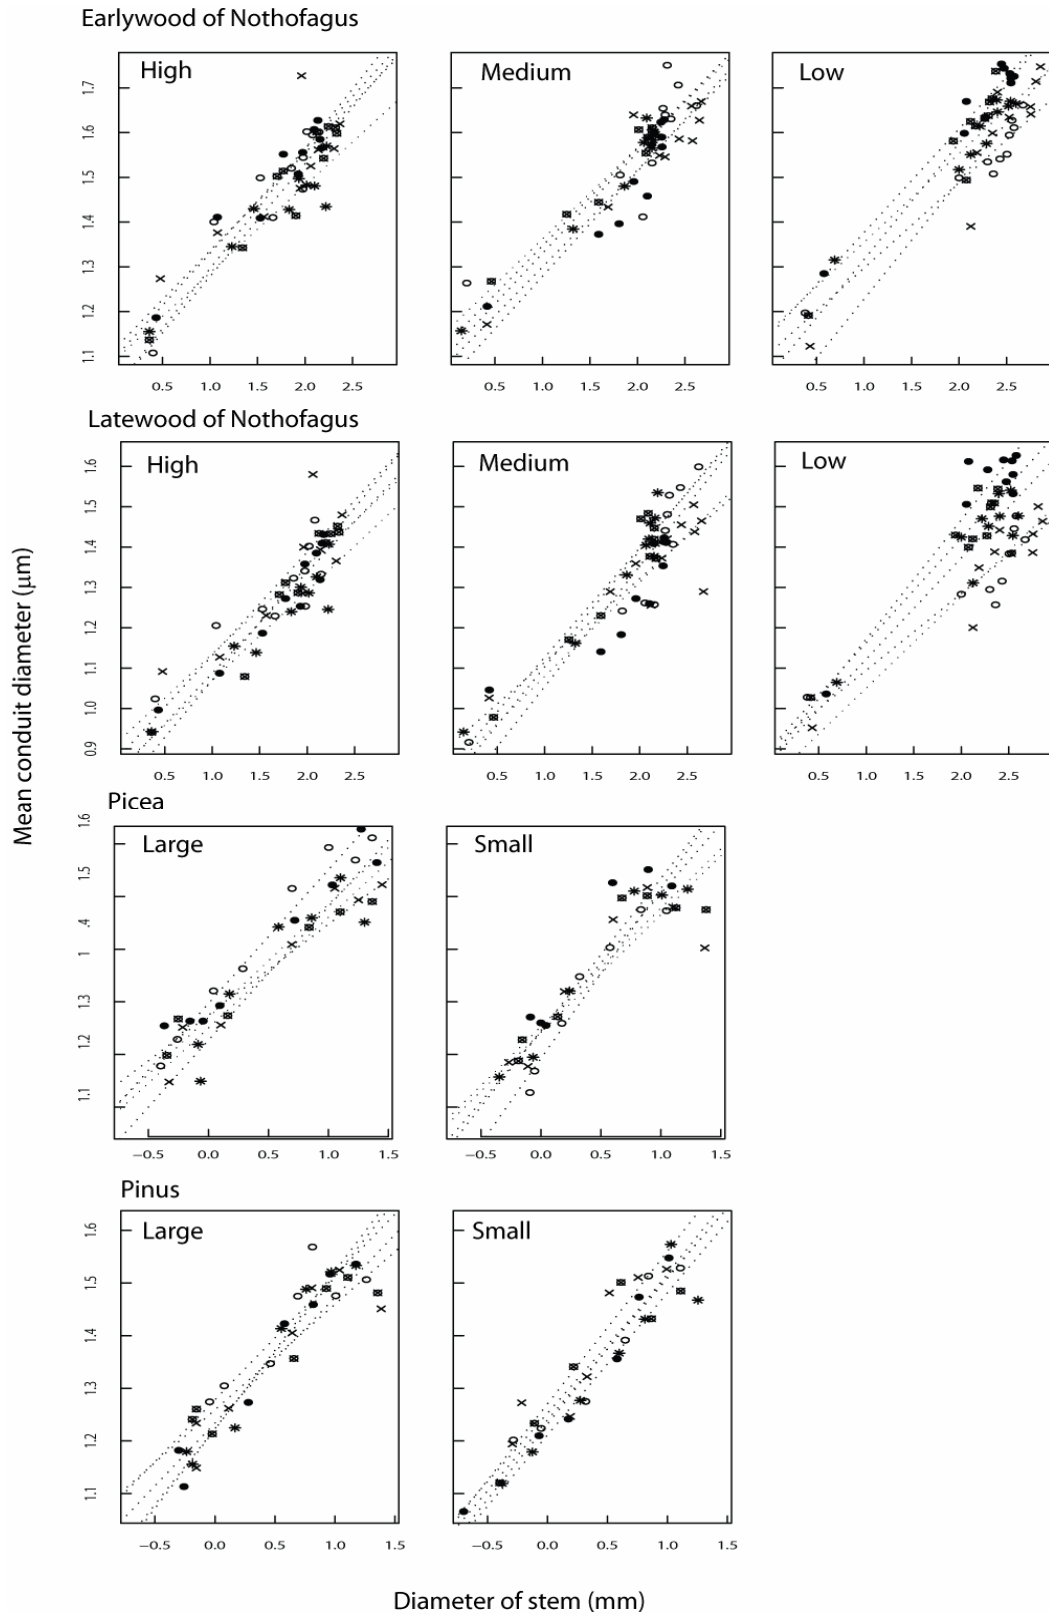

**Table S3:** Intercept and slope of allometric relationships between the conduit diameter (C) and distance from tree top (H) for each tree sampled, estimated by SMA regression, with 95% confidence intervals in brackets.

| Earlywood Nothofagus |                  |   |               |                      |
|----------------------|------------------|---|---------------|----------------------|
| <i>Altitude</i>      | <i>Intercept</i> |   |               | <i>Slope</i>         |
| High                 | 1.41             | ( | 1.37 , 1.45 ) | 0.28 ( 0.22 , 0.36 ) |
| High                 | 1.46             | ( | 1.39 , 1.53 ) | 0.25 ( 0.16 , 0.41 ) |
| High                 | 1.38             | ( | 1.34 , 1.42 ) | 0.22 ( 0.16 , 0.30 ) |
| High                 | 1.43             | ( | 1.39 , 1.47 ) | 0.30 ( 0.23 , 0.39 ) |
| High                 | 1.44             | ( | 1.40 , 1.47 ) | 0.25 ( 0.20 , 0.31 ) |
| Medium               | 1.44             | ( | 1.37 , 1.51 ) | 0.24 ( 0.17 , 0.34 ) |
| Medium               | 1.41             | ( | 1.35 , 1.46 ) | 0.23 ( 0.18 , 0.30 ) |
| Medium               | 1.39             | ( | 1.34 , 1.43 ) | 0.24 ( 0.18 , 0.30 ) |
| Medium               | 1.43             | ( | 1.40 , 1.47 ) | 0.19 ( 0.15 , 0.24 ) |
| Medium               | 1.38             | ( | 1.34 , 1.42 ) | 0.22 ( 0.17 , 0.29 ) |
| Low                  | 1.39             | ( | 1.36 , 1.42 ) | 0.19 ( 0.16 , 0.22 ) |
| Low                  | 1.37             | ( | 1.33 , 1.42 ) | 0.28 ( 0.24 , 0.33 ) |
| Low                  | 1.46             | ( | 1.44 , 1.49 ) | 0.16 ( 0.14 , 0.19 ) |
| Low                  | 1.41             | ( | 1.36 , 1.46 ) | 0.22 ( 0.17 , 0.27 ) |
| Low                  | 1.50             | ( | 1.47 , 1.53 ) | 0.20 ( 0.18 , 0.23 ) |
| Latewood Nothofagus  |                  |   |               |                      |
| <i>Altitude</i>      | <i>Intercept</i> |   |               | <i>Slope</i>         |
| High                 | 1.23             | ( | 1.18 , 1.28 ) | 0.23 ( 0.16 , 0.33 ) |
| High                 | 1.27             | ( | 1.20 , 1.35 ) | 0.30 ( 0.19 , 0.47 ) |
| High                 | 1.18             | ( | 1.13 , 1.22 ) | 0.25 ( 0.18 , 0.34 ) |
| High                 | 1.24             | ( | 1.21 , 1.28 ) | 0.34 ( 0.28 , 0.41 ) |
| High                 | 1.20             | ( | 1.16 , 1.24 ) | 0.27 ( 0.21 , 0.34 ) |
| Medium               | 1.18             | ( | 1.11 , 1.26 ) | 0.33 ( 0.25 , 0.43 ) |
| Medium               | 1.22             | ( | 1.14 , 1.29 ) | 0.22 ( 0.15 , 0.32 ) |
| Medium               | 1.19             | ( | 1.14 , 1.25 ) | 0.28 ( 0.22 , 0.36 ) |
| Medium               | 1.21             | ( | 1.14 , 1.27 ) | 0.27 ( 0.19 , 0.38 ) |
| Medium               | 1.18             | ( | 1.13 , 1.24 ) | 0.22 ( 0.16 , 0.31 ) |
| Low                  | 1.19             | ( | 1.14 , 1.24 ) | 0.19 ( 0.14 , 0.24 ) |
| Low                  | 1.18             | ( | 1.13 , 1.22 ) | 0.24 ( 0.20 , 0.29 ) |
| Low                  | 1.26             | ( | 1.19 , 1.33 ) | 0.20 ( 0.14 , 0.28 ) |
| Low                  | 1.25             | ( | 1.20 , 1.31 ) | 0.21 ( 0.17 , 0.27 ) |
| Low                  | 1.33             | ( | 1.24 , 1.41 ) | 0.26 ( 0.19 , 0.35 ) |
| Picea                |                  |   |               |                      |
| <i>Island size</i>   | <i>Intercept</i> |   |               | <i>Slope</i>         |
| Large                | 1.46             | ( | 1.41 , 1.50 ) | 0.19 ( 0.15 , 0.24 ) |
| Large                | 1.40             | ( | 1.36 , 1.44 ) | 0.15 ( 0.11 , 0.20 ) |
| Large                | 1.39             | ( | 1.35 , 1.44 ) | 0.14 ( 0.10 , 0.20 ) |
| Large                | 1.41             | ( | 1.36 , 1.45 ) | 0.13 ( 0.09 , 0.19 ) |
| Large                | 1.42             | ( | 1.37 , 1.46 ) | 0.16 ( 0.12 , 0.21 ) |
| Small                | 1.38             | ( | 1.35 , 1.41 ) | 0.17 ( 0.13 , 0.21 ) |
| Small                | 1.39             | ( | 1.32 , 1.46 ) | 0.14 ( 0.08 , 0.24 ) |
| Small                | 1.43             | ( | 1.38 , 1.49 ) | 0.18 ( 0.13 , 0.25 ) |
| Small                | 1.40             | ( | 1.35 , 1.46 ) | 0.14 ( 0.09 , 0.22 ) |
| Small                | 1.43             | ( | 1.34 , 1.52 ) | 0.16 ( 0.09 , 0.28 ) |
| Pinus                |                  |   |               |                      |
| <i>Island size</i>   | <i>Intercept</i> |   |               | <i>Slope</i>         |
| Large                | 1.44             | ( | 1.39 , 1.49 ) | 0.11 ( 0.07 , 0.18 ) |
| Large                | 1.38             | ( | 1.31 , 1.45 ) | 0.15 ( 0.09 , 0.24 ) |
| Large                | 1.38             | ( | 1.34 , 1.43 ) | 0.17 ( 0.13 , 0.23 ) |
| Large                | 1.38             | ( | 1.32 , 1.45 ) | 0.13 ( 0.08 , 0.22 ) |
| Large                | 1.38             | ( | 1.33 , 1.44 ) | 0.17 ( 0.12 , 0.24 ) |
| Small                | 1.41             | ( | 1.35 , 1.47 ) | 0.16 ( 0.10 , 0.23 ) |
| Small                | 1.42             | ( | 1.36 , 1.49 ) | 0.16 ( 0.10 , 0.25 ) |
| Small                | 1.37             | ( | 1.32 , 1.43 ) | 0.17 ( 0.12 , 0.23 ) |
| Small                | 1.41             | ( | 1.35 , 1.47 ) | 0.16 ( 0.11 , 0.24 ) |
| Small                | 1.38             | ( | 1.33 , 1.43 ) | 0.19 ( 0.15 , 0.26 ) |

**Fig S2** Allometric relationships between the conduit diameter (C) and distance from top of tree, estimated for each tree using SMA regression.

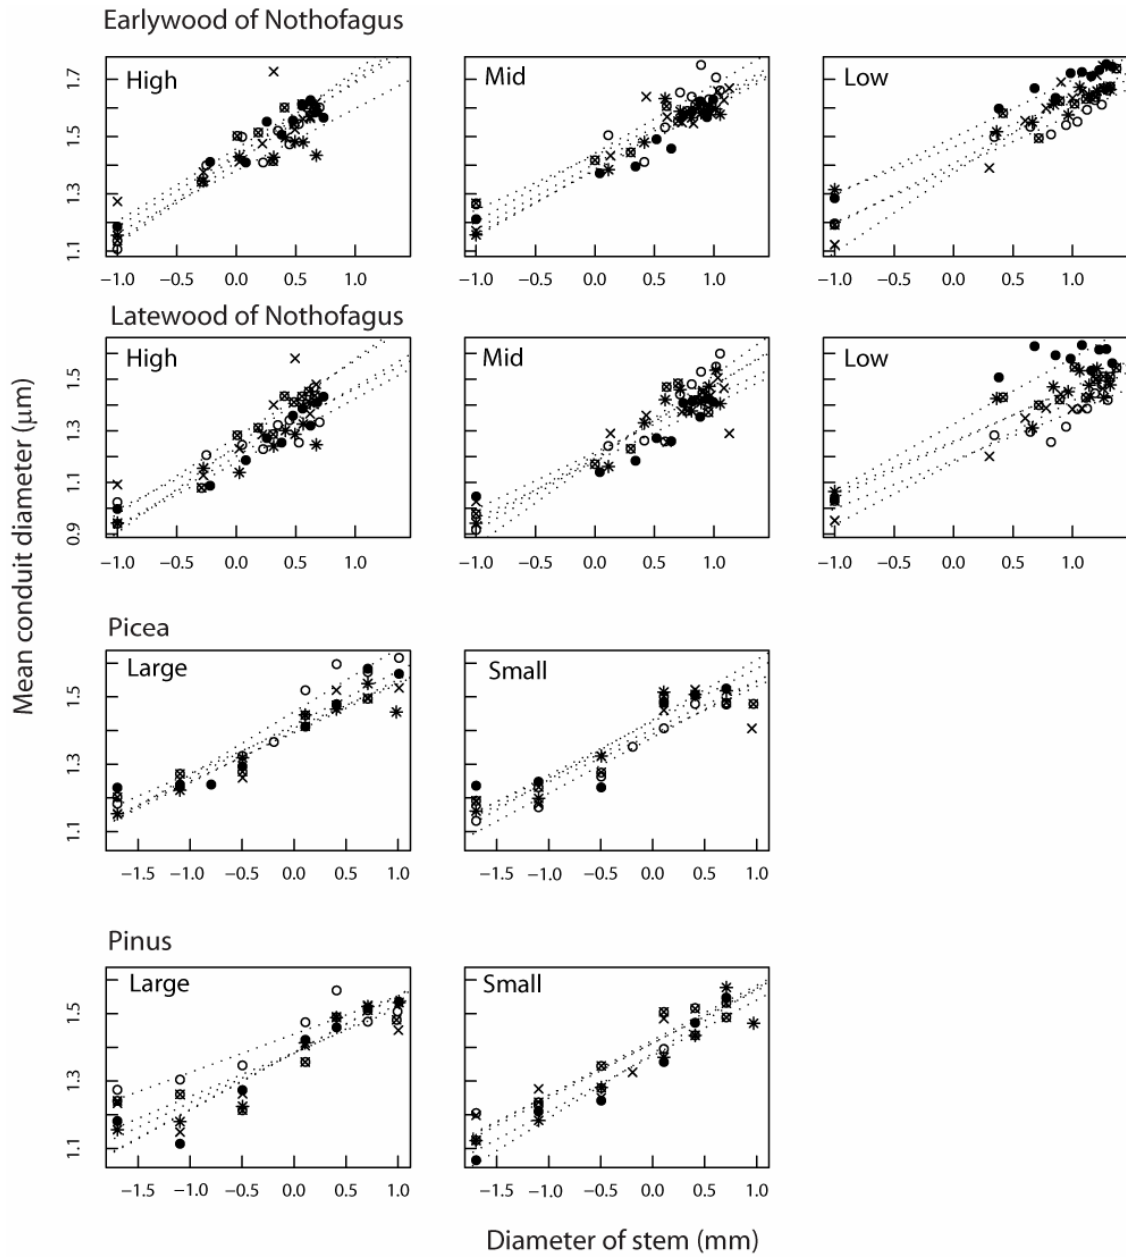

Supplement: rsbl20060551s07.pdf [file rsbl20060551s07.pdf]
